# Supplementary material for: The Rhizosphere Functional Microbial Community: A Key Driver of Phosphorus Utilization Efficiency in Karst Forest Plants
Source: MDPI journal article supplement (doi:10.3390/f15030453), 2024-02-28
Supplement: s1 [file s1]

**Table S1.** Plant nutrient contents, N:P, and plant P utilization efficiency index (PPEI).

| Plant species                                         | Abbreviation | Plant nutrient contents (mg/g) |            |            |            |            | N:P          | PPEI          |
|-------------------------------------------------------|--------------|--------------------------------|------------|------------|------------|------------|--------------|---------------|
|                                                       |              | C                              | N          | P          | K          | Ca         |              |               |
| <i>Nandina domestica</i> Thunb.                       | ND           | 454.0 ± 13.0                   | 37.0 ± 0.5 | 2.8 ± 0.1  | 4.1 ± 0.6  | 5.9 ± 0.5  | 13.21 ± 0.4  | 0.075 ± 0.005 |
| <i>Mahonia bodinieri</i> Gagnep.                      | MB           | 391.6 ± 16.6                   | 12.6 ± 0.6 | 0.8 ± 0.1  | 3.8 ± 0.8  | 6.4 ± 0.2  | 15.75 ± 0.73 | 0.078 ± 0.003 |
| <i>Pyracantha fortuneana</i> (Maxim.) Li              | PF           | 410.2 ± 17.5                   | 13.5 ± 0.8 | 0.8 ± 0.1  | 2.4 ± 0.5  | 17.4 ± 0.6 | 16.88 ± 0.73 | 0.073 ± 0.003 |
| <i>Rhus chinensis</i> Mill.                           | RC           | 485.4 ± 15.0                   | 15.7 ± 0.8 | 0.8 ± 0.1  | 4.0 ± 1.2  | 15.8 ± 0.7 | 17.44 ± 0.60 | 0.057 ± 0.002 |
| <i>Zanthoxylum armatum</i> DC.                        | ZA           | 467.0 ± 18.7                   | 26.7 ± 1.4 | 1.4 ± 0.1  | 5.2 ± 0.4  | 12.8 ± 0.8 | 17.80 ± 0.81 | 0.056 ± 0.006 |
| <i>Loropetalum chinense</i> (R. Br.) Oliver           | LC           | 471.8 ± 14.8                   | 13.9 ± 0.4 | 0.7 ± 0.1  | 2.6 ± 0.6  | 14.7 ± 0.3 | 19.86 ± 0.21 | 0.050 ± 0.005 |
| <i>Diospyros dumetorum</i> W. W. Sm.                  | DD           | 463.6 ± 13.9                   | 12.3 ± 0.5 | 0.6 ± 0.1  | 5.7 ± 0.6  | 11.0 ± 0.4 | 20.50 ± 1.41 | 0.049 ± 0.004 |
| <i>Lindera communis</i> Hemsl.                        | LC           | 565.3 ± 24.5                   | 15.5 ± 0.5 | 0.8 ± 0.01 | 2.6 ± 0.3  | 8.5 ± 0.5  | 19.38 ± 0.73 | 0.052 ± 0.003 |
| <i>Liquidambar formosana</i> Hance                    | LF           | 460.6 ± 23.7                   | 23.2 ± 1.2 | 1.1 ± 0.1  | 3.4 ± 0.7  | 12.1 ± 0.3 | 21.09 ± 1.92 | 0.047 ± 0.005 |
| <i>Viburnum brachybotryum</i> Hemsl.                  | VB           | 498.6 ± 17.0                   | 15.9 ± 0.8 | 0.7 ± 0.2  | 5.1 ± 0.6  | 14.8 ± 1.0 | 22.71 ± 0.4  | 0.044 ± 0.006 |
| <i>Cinnamomum glanduliferum</i> (Wall.) Nees          | CG           | 443.3 ± 18.2                   | 16.7 ± 0.8 | 0.8 ± 0.1  | 3.0 ± 0.1  | 11.3 ± 1.2 | 20.88 ± 0.28 | 0.048 ± 0.003 |
| <i>Phoebe crassipedicella</i> S. K. Lee & F. N. Wei   | PC           | 453.7 ± 16.1                   | 15.2 ± 0.4 | 0.7 ± 0.2  | 3.1 ± 0.1  | 9.0 ± 1.0  | 21.71 ± 1.25 | 0.046 ± 0.003 |
| <i>Hydrangea aspera</i> D. Don                        | HA           | 478.5 ± 16.4                   | 19.3 ± 0.6 | 0.8 ± 0.1  | 2.9 ± 0.2  | 11.3 ± 0.9 | 24.12 ± 0.24 | 0.041 ± 0.011 |
| <i>Euonymus japonicus</i> Thunb.                      | EJ           | 406.3 ± 13.9                   | 13.0 ± 0.2 | 0.5 ± 0.02 | 2.7 ± 0.04 | 7.7 ± 0.6  | 26.00 ± 0.40 | 0.038 ± 0.005 |
| <i>Camellia ilicifolia</i> Y. K. Li ex Huang T. Chang | CI           | 468.2 ± 24.8                   | 12.1 ± 0.5 | 0.5 ± 0.1  | 2.7 ± 0.1  | 21.6 ± 1.8 | 24.20 ± 0.7  | 0.041 ± 0.005 |
| <i>Pteroceltis tatarinowii</i> Maxim.                 | PT           | 448.4 ± 12.5                   | 17.9 ± 1.0 | 0.7 ± 0.1  | 3.5 ± 0.2  | 21.3 ± 2.8 | 25.57 ± 0.86 | 0.039 ± 0.003 |
| <i>Gardenia jasminoides</i> J. Ellis                  | GJ           | 428.7 ± 14.0                   | 20.3 ± 1.0 | 0.8 ± 0.04 | 5.3 ± 0.3  | 11.2 ± 1.3 | 25.38 ± 0.96 | 0.039 ± 0.002 |
| <i>Tirpitzia sinensis</i> (Hemsl.) Hallier f.         | TS           | 476.9 ± 19.5                   | 27.4 ± 0.9 | 1.0 ± 0.04 | 3.4 ± 0.3  | 19.0 ± 1.1 | 27.40 ± 1.5  | 0.037 ± 0.004 |
| <i>Albizia kalkora</i> (Roxb.) Prain                  | AK           | 507.5 ± 23.9                   | 37.2 ± 0.8 | 1.2 ± 0.1  | 2.6 ± 0.1  | 8.8 ± 1.3  | 31.00 ± 1.91 | 0.032 ± 0.004 |
| <i>Morella rubra</i> Lour.                            | MR           | 511.5 ± 15.0                   | 16.1 ± 0.8 | 0.4 ± 0.04 | 2.4 ± 0.1  | 9.5 ± 1.2  | 40.25 ± 3.27 | 0.025 ± 0.004 |
| Average                                               |              | 464.6 ± 41.8                   | 19.1 ± 7.5 | 0.9 ± 0.5  | 3.5 ± 1.1  | 12.5 ± 4.7 | 22.73 ± 5.98 | 0.047 ± 0.012 |

\*Data are expressed as means ± SD by one-way ANOVA.

**Table S2.** Rhizosphere soil properties of the 20 investigated plants.

| Plant species                                         | Abbreviation | pH   | Total nutrients (%) |      |      | Available nutrients (mg/kg) |       |      |       |
|-------------------------------------------------------|--------------|------|---------------------|------|------|-----------------------------|-------|------|-------|
|                                                       |              |      | TN                  | TP   | TCa  | SOC                         | AN    | AP   | ACa   |
| <i>Nandina domestica</i> Thunb.                       | ND           | 6.03 | 0.66                | 1.42 | 0.78 | 62.8                        | 360.7 | 13.9 | 30.41 |
| <i>Mahonia bodinieri</i> Gagnep.                      | MB           | 5.68 | 0.43                | 1.53 | 0.40 | 43.4                        | 257.6 | 6.0  | 17.05 |
| <i>Pyracantha fortuneana</i> (Maxim.) Li              | PF           | 5.53 | 0.36                | 1.27 | 0.35 | 39.3                        | 240.8 | 6.6  | 15.57 |
| <i>Rhus chinensis</i> Mill.                           | RC           | 6.09 | 0.33                | 1.56 | 0.40 | 34.3                        | 193.2 | 17.6 | 18.96 |
| <i>Zanthoxylum armatum</i> DC.                        | ZA           | 6.02 | 0.46                | 1.91 | 0.51 | 44.4                        | 270.2 | 5.8  | 22.02 |
| <i>Loropetalum chinense</i> (R. Br.) Oliver           | LC           | 5.83 | 0.34                | 1.20 | 0.35 | 31.4                        | 223.3 | 4.5  | 15.94 |
| <i>Diospyros dumetorum</i> W. W. Sm.                  | DD           | 5.91 | 0.31                | 1.63 | 0.35 | 29.7                        | 180.6 | 5.1  | 15.10 |
| <i>Lindera communis</i> Hemsl.                        | LC           | 5.95 | 0.38                | 1.47 | 0.30 | 40.6                        | 217.9 | 6.8  | 15.19 |
| <i>Liquidambar formosana</i> Hance                    | LF           | 5.72 | 0.42                | 2.75 | 0.44 | 41.4                        | 260.4 | 6.1  | 19.49 |
| <i>Viburnum brachybotryum</i> Hemsl.                  | VB           | 6.30 | 0.42                | 1.41 | 0.59 | 40.3                        | 212.8 | 11.2 | 26.51 |
| <i>Cinnamomum glanduliferum</i> (Wall.) Nees          | CG           | 6.12 | 0.56                | 1.41 | 0.79 | 56.2                        | 330.9 | 17.2 | 32.50 |
| <i>Phoebe crassipedicella</i> S. K. Lee & F. N. Wei   | PC           | 6.01 | 0.74                | 1.52 | 0.89 | 70.7                        | 391.1 | 9.1  | 34.38 |
| <i>Hydrangea aspera</i> D. Don                        | HA           | 6.11 | 0.47                | 3.41 | 0.65 | 44.9                        | 262.3 | 5.2  | 26.39 |
| <i>Euonymus japonicus</i> Thunb.                      | EJ           | 5.78 | 0.28                | 0.95 | 0.24 | 25.2                        | 163.8 | 5.1  | 10.33 |
| <i>Camellia ilicifolia</i> Y. K. Li ex Huang T. Chang | CI           | 6.19 | 0.55                | 1.45 | 0.62 | 50.8                        | 304.7 | 6.1  | 24.32 |
| <i>Pteroceltis tatarinowii</i> Maxim.                 | PT           | 6.03 | 0.51                | 2.13 | 0.62 | 51.2                        | 293.1 | 6.5  | 26.41 |
| <i>Gardenia jasminoides</i> J. Ellis                  | GJ           | 5.68 | 0.28                | 1.22 | 0.38 | 25.9                        | 162.9 | 23.6 | 15.55 |
| <i>Tirpitzia sinensis</i> (Hemsl.) Hallier f.         | TS           | 6.13 | 0.94                | 2.05 | 1.25 | 93.3                        | 478.3 | 14.2 | 45.86 |
| <i>Albizia kalkora</i> (Roxb.) Prain                  | AK           | 5.85 | 0.26                | 1.48 | 0.38 | 21.4                        | 122.3 | 3.7  | 16.02 |
| <i>Morella rubra</i> Lour.                            | MR           | 6.29 | 0.58                | 1.59 | 0.87 | 59.4                        | 295.9 | 8.0  | 37.42 |
| Average                                               |              | 5.96 | 0.46                | 1.67 | 0.56 | 45.3                        | 261.1 | 9.12 | 23.27 |

**Table S3.** The average relative abundance (%) of genes involved in the four P cycling groups for plants with high and low PPEI.

| P cycling groups                 | PPEI        |             | Independent <i>T</i> -test |
|----------------------------------|-------------|-------------|----------------------------|
|                                  | High        | Low         |                            |
| Inorganic P solubilization       | 3.77 ± 0.36 | 3.42 ± 0.30 | *                          |
| Organic P mineralization         | 6.88 ± 0.73 | 5.97 ± 0.40 | **                         |
| P uptake and transport system    | 3.14 ± 0.26 | 2.71 ± 0.24 | **                         |
| P starvation response regulation | 1.01 ± 0.17 | 0.86 ± 0.10 | *                          |

\*PPEI, plant P utilization efficiency index; Data are expressed as means ± SD (*n* = 9) by one-way ANOVA; \* and \*\* indicate significant differences at *p* < 0.05 and *p* < 0.01 between the two groups of plants based on an independent *T*-test.

**Table S4.** The average relative abundance (%) of genes involved in the six organic P mineralization groups for plants with high and low PPEI.

| Organic P mineralization groups | PPEI        |             | Independent <i>T</i> -test |
|---------------------------------|-------------|-------------|----------------------------|
|                                 | High        | Low         |                            |
| Phosphomonoesterase             | 2.69 ± 0.27 | 2.32 ± 0.14 | **                         |
| Phosphodiesterase               | 2.71 ± 0.45 | 2.36 ± 0.30 | <i>ns</i>                  |
| Organic pyrophosphatase         | 0.72 ± 0.09 | 0.61 ± 0.04 | **                         |
| C-P lyase                       | 0.46 ± 0.12 | 0.41 ± 0.07 | <i>ns</i>                  |
| Phosphonate                     | 0.20 ± 0.05 | 0.18 ± 0.03 | <i>ns</i>                  |
| Phosphotriesterase              | 0.10 ± 0.02 | 0.10 ± 0.01 | <i>ns</i>                  |

\*PPEI, plant P utilization efficiency index; Data are expressed as means ± SD (*n* = 9) by one-way ANOVA; \* and \*\* indicate significant differences at *p* < 0.05 and *p* < 0.01 between the two groups of plants based on an independent *T*-test.

**Table S5.** The average relative abundance (%) of genes involved in the four P uptake and transport system groups for plants with high and low PPEI.

| P uptake and transport system | PPEI         |              | Independent <i>T</i> -test |
|-------------------------------|--------------|--------------|----------------------------|
|                               | High         | Low          |                            |
| Phosphate transport system    | 1.92 ± 0.23  | 1.64 ± 0.12  | **                         |
| Phosphonate transport system  | 0.76 ± 0.21  | 0.68 ± 0.11  | <i>ns</i>                  |
| GP phosphate transport system | 0.44 ± 0.06  | 0.37 ± 0.05  | *                          |
| IP phosphate transport system | 0.01 ± 0.002 | 0.01 ± 0.004 | <i>ns</i>                  |

\*PPEI, plant P utilization efficiency index; Data are expressed as means ± SD (*n* = 9) by one-way ANOVA; \* and \*\* indicate significant differences at *p* < 0.05 and *p* < 0.01 between the two groups of plants based on an independent *T*-test.

**Table S6.** The average relative abundance (%) of genes involved in the four P uptake and transport system groups for plants with high and low PPEI.

| Phosphate transport system                                                                                 | PPEI            |                 | Independent <i>T</i> -test |
|------------------------------------------------------------------------------------------------------------|-----------------|-----------------|----------------------------|
|                                                                                                            | High            | Low             |                            |
| High-affinity phosphate-specific transporters<br>( <i>pstS</i> + <i>pstA</i> + <i>pstB</i> + <i>pstC</i> ) | 0.017 ± 0.002   | 0.015 ± 0.001   | **                         |
| Low-affinity phosphate-specific transporters<br>( <i>pit</i> )                                             | 0.0018 ± 0.0006 | 0.0016 ± 0.0006 | <i>ns</i>                  |

\*PPEI, plant P utilization efficiency index; Data are expressed as means ± SD (*n* = 9) by one-way ANOVA; \* and \*\* indicate significant differences at *p* < 0.05 and *p* < 0.01 between the two groups of plants based on an independent *T*-test.

**Table S7.** The relative abundance (%) of top 10 predominant microbial species involved in P cycling.

| Microbial species                                     | Microbial phyla         | <i>ND</i>      | <i>MB</i>       | <i>PF</i>      | <i>TS</i>      | <i>AK</i>       | <i>MR</i>       |
|-------------------------------------------------------|-------------------------|----------------|-----------------|----------------|----------------|-----------------|-----------------|
| <i>Actinobacteria_bacterium</i>                       | Actinobacteria          | 0.108 ± 0.109a | 0.053 ± 0.001a  | 0.029 ± 0.006a | 0.060 ± 0.011a | 0.050 ± 0.027a  | 0.033 ± 0.006a  |
| <i>Alphaproteobacteria_bacterium</i>                  | Proteobacteria          | 0.045 ± 0.029a | 0.071 ± 0.038a  | 0.058 ± 0.022a | 0.034 ± 0.008a | 0.066 ± 0.024a  | 0.059 ± 0.036a  |
| <i>Candidatus_Rokubacteria_bacterium</i>              | Candidatus_Rokubacteria | 0.060 ± 0.031a | 0.061 ± 0.020a  | 0.057 ± 0.009a | 0.046 ± 0.008a | 0.061 ± 0.014a  | 0.049 ± 0.015a  |
| <i>Deltaproteobacteria_bacterium</i>                  | Proteobacteria          | 0.061 ± 0.024a | 0.054 ± 0.028a  | 0.048 ± 0.009a | 0.046 ± 0.012a | 0.072 ± 0.014a  | 0.052 ± 0.007a  |
| <i>Acidobacteria_bacterium</i>                        | Acidobacteria           | 0.048 ± 0.006a | 0.060 ± 0.027a  | 0.070 ± 0.034a | 0.032 ± 0.006a | 0.072 ± 0.025a  | 0.051 ± 0.021a  |
| <i>Betaproteobacteria_bacterium</i>                   | Proteobacteria          | 0.036 ± 0.016c | 0.053 ± 0.015ab | 0.087 ± 0.026a | 0.034 ± 0.007c | 0.079 ± 0.029ab | 0.044 ± 0.013bc |
| <i>Rhizobiales_bacterium</i>                          | Proteobacteria          | 0.080 ± 0.054a | 0.067 ± 0.032a  | 0.045 ± 0.009a | 0.056 ± 0.016a | 0.034 ± 0.006a  | 0.051 ± 0.013a  |
| <i>Verrucomicrobia_bacterium</i>                      | Verrucomicrobia         | 0.042 ± 0.028a | 0.063 ± 0.037a  | 0.064 ± 0.027a | 0.032 ± 0.006a | 0.076 ± 0.020a  | 0.055 ± 0.036a  |
| <i>Alphaproteobacteria_bacterium_13_2_20CM_2_64_7</i> | Proteobacteria          | 0.050 ± 0.031a | 0.076 ± 0.042a  | 0.056 ± 0.016a | 0.032 ± 0.008a | 0.064 ± 0.018a  | 0.055 ± 0.028a  |
| <i>Bradyrhizobium_erythrophlei</i>                    | Proteobacteria          | 0.056 ± 0.035a | 0.065 ± 0.032a  | 0.052 ± 0.017a | 0.044 ± 0.007a | 0.055 ± 0.011a  | 0.061 ± 0.025a  |

\*In each line, means ± SD followed by different small letters indicate a significant difference ( $p < 0.05$ ) between the six studied plants based on a one-way ANOVA followed by an LSD test.

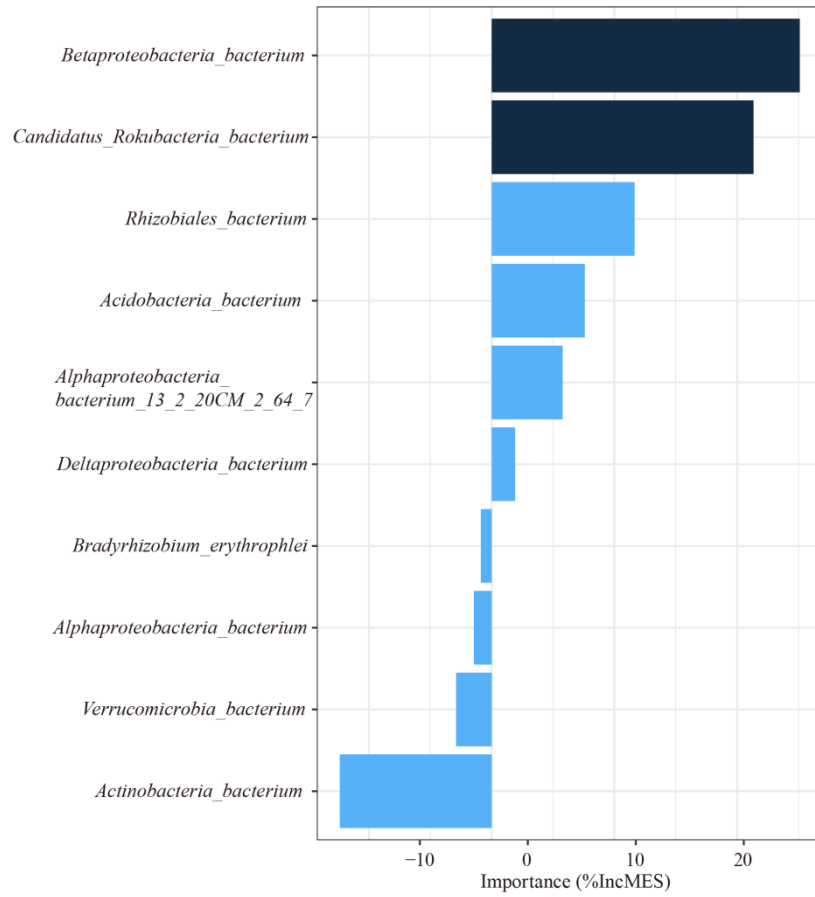

Figure S1. Relative importance of the relative abundance of the top 10 microbial species to the PPEI. The dark blue color indicates a significant effect ( $p < 0.05$ ) and the light blue indicates not significant. The higher the %IncMSE value, the more important the variable. PPEI, plant P utilization efficiency index.
